# Supplementary material for: Knowledge and Attitude of ER and Intensive Care Unit Physicians toward Do-Not-Resuscitate in a Tertiary Care Center in Saudi Arabia: A Survey Study
Source: PubMed Central journal article supplement — Indian J Crit Care Med. 2018 Apr;22(4):214–22. doi: 10.4103/ijccm.IJCCM_523_17 (PMC5930524; doi:10.4103/ijccm.ijccm_523_17), 2018-04
Supplement: IJCCM-22-214_Suppl1.pdf [file IJCCM-22-214_Suppl1.pdf]

**15. How many times did you discuss DNR status with a patient/family**

- 0
- 1 – 3
- 4 – 8
- >9

**16. How to open discussion of DNR with patient/family**

- Ask about their understanding of patient’s illness
- Explain what DNR is
- Ask if they know what DNR is
- Discuss the patient’s medical problem

**17. On average, how much do you spend in discussing DNR status**

- 0 – 5 minutes
- 6 – 10
- >10
- Not done before

**18. How comfortable are you in discussing DNR status with patient/family?**

- Very comfortable
- Somewhat comfortable
- Not comfortable

**19. What are the possible barriers to your effective DNR discussion with patient/family**

- Lack of time
- Inadequate training
- Lack of patient/family understanding
- This is not your job
- It is against my religious beliefs
- I feel the patient will be neglected
- Weak palliative care in my hospital
- Other: specify

**20. In your opinion, what do you think the OBSTACLE to initiate DNR**

- Religious
- Cultural
- Patient/family level of education
- policy

**21. Do you believe that DNR would mean that the patient will receive substandard level of care?**

- Yes
- Maybe
- No

**22. Do you think training during residency will improve the ability to discuss DNR?**

Yes No

**23. Should nurses be involved in DNR decision?**

Yes No

**24. Do you have advance directives**

Yes No

**25. Do you believe every patient should have advance directives**

Yes No

**26. If you have terminal illness or illness with futile treatment what do you want for yourself?**

- DNR
- Full support

**27. In principle, you believe the following actions in a dying patient are acceptable:**

|                                    | Strongly agree | Agree | Uncertain | Disagree | Strongly disagree |
|------------------------------------|----------------|-------|-----------|----------|-------------------|
| Withholding life-saving treatments | 5              | 4     | 3         | 2        | 1                 |
| Withdrawing life-saving treatments | 5              | 4     | 3         | 2        | 1                 |
| DNR                                | 5              | 4     | 3         | 2        | 1                 |

**28. How do you define “futile treatment?” (Circle the best choice)**

1. 0-1% chance of surviving
2. Requirement of continuous ICU treatment
3. Maintenance of a persistent vegetative state
4. Ineffective in achieving the desired outcome
5. Inability to provide the physiologic effect of a treatment
6. Other (specify) \_\_\_\_\_

**29. Do you use the concept of “futile treatment” in addressing DNR?** Yes No

**30. Are clinical ethics committees presenting in your hospital to help with DNR orders?**

Yes No Uncertain

**31. If yes, do you use them in DNR context?**

|        |       |           |        |       |
|--------|-------|-----------|--------|-------|
| Always | Often | Sometimes | Rarely | Never |
| 5      | 4     | 3         | 2      | 1     |

**32. Do you currently have guidelines for end of life decisions in your ICU/ER?**

|     |    |           |
|-----|----|-----------|
| Yes | No | Uncertain |
| 1   | 2  | 3         |

**33. If not, do you think such guidelines would be helpful?**

|                   |   |   |   |            |
|-------------------|---|---|---|------------|
| To a great extent |   |   |   | Not at all |
| 5                 | 4 | 3 | 2 | 1          |

**34. Would you be willing to use professionally developed guidelines?**

|                   |   |   |   |            |
|-------------------|---|---|---|------------|
| To a great extent |   |   |   | Not at all |
| 5                 | 4 | 3 | 2 | 1          |

**35. Do you think educational programs could change your practices for DNR?**

|                   |   |   |   |            |
|-------------------|---|---|---|------------|
| To a great extent |   |   |   | Not at all |
| 5                 | 4 | 3 | 2 | 1          |

**36. Does your ICU/ER have emotional counseling/support services for its staff?**

Yes No Uncertain

**37. Do you think your ICU/ER should have such a program?**

Yes No Uncertain

**38. If you were diagnosed as having a terminal illness, would you want:**

|                               |            |          |           |          |            |
|-------------------------------|------------|----------|-----------|----------|------------|
|                               | Definitely | Probably | Uncertain | Probably | Definitely |
|                               | yes        | yes      |           | not      | not        |
| 1. To go into ICU?            | 5          | 4        | 3         | 2        | 1          |
| 2. To undergo CPR?            | 5          | 4        | 3         | 2        | 1          |
| 3. To be put on a ventilator? | 5          | 4        | 3         | 2        | 1          |

**39. You answered the above questions as you did because of the importance of the value of life (being 5) or the quality of life (being 1)?**

|               |   |   |   |                 |
|---------------|---|---|---|-----------------|
| Value of life |   |   |   | Quality of life |
| 5             | 4 | 3 | 2 | 1               |

**40.** Your age: \_\_\_\_\_

**41.** Your sex: 1. Male 2. Female

**42.** Your marital status: 1. Married 2. Single 3. Separated/divorced 4. Widowed

**43.** Your religion: 1. Muslim 2. Protestant 3. Jewish 4. Catholic 5. Other (specify) \_\_\_\_\_

**44.** You consider yourself: 1. Non-religious 2. Religious 3. Very religious

**45.** Your gross annual household income is:

1. Less than 100,000 SR;
2. 100,001-200,000 SR;
3. 200,001-400,000 SR;

4. 400,001-600,000 SR;
5. More than 600,00 SR

**You can refuse to answer this question if you believe it is too personal.**

46. Country of medical training: \_\_\_\_\_
47. Have you had special training in ICU/ER? 1. Yes 2. No
48. Number of years practicing in ICU/ER: \_\_\_\_\_
49. Average hours per week clinically in the ICU/ER: \_\_\_\_\_
50. Your role in ICU/ER is:
1. consultant
  2. Asso/assiss/staph phys
  3. Resident or fellow physician
  4. Intern
  5. student
  6. other
51. You are entitled for DNR orders ICU/ER patients: 1. Yes, 2. No
